# Supplementary material
Source: Springer Nature journal article supplement (https://www.springermedizin.de/resource/supplementary/12958_2005_312_MOESM1_ESM.pdf/9567604)
Supplement: MOESM1 [file 9567604]

## Pesticide exposure

### Mechanisms of action:

- Direct damage to the structure of cells
- Interference with biochemical processes necessary for normal cell function
- Biotransformation resulting in toxic metabolites

- Effect on fertility

- Spontaneous abortion  
- Stillbirths  
- Premature birth

- Low birth weight  
- Developmental defects

### - Disruption of hormonal function:

- Interference with hormone synthesis
- Interference with hormone release and storage
- Interference with hormone transport and clearance
- Interference with hormone receptor recognition and binding
- Interference with hormone postreceptor activation
- Interference with the thyroid function
- Interference with the central nervous system

### - Effect on reproductive system:

- Changes in hormone levels
- Ovarian cycle irregularities
- Impaired fertility

- Spontaneous abortion?  
- Premature birth?

- Developmental defects?
